# Supplementary material
Source: MDPI journal article supplement (https://www.mdpi.com/2073-4344/13/3/476)
Supplement: s1 [file s1 › catalysts-2168452-supplementary.pdf]

**Table S1.** Parameters calculated for adsorption of Cd(II) over CNTs–Ag<sub>2</sub>S from the intra-particle diffusion plot provided in Fig. S2.

| Intra-particle diffusion model |        |        |                              |       |        |
|--------------------------------|--------|--------|------------------------------|-------|--------|
| $K_{id-1}$                     | $c$    | $R^2$  | $k_{id-2}$                   | $c$   | $R^2$  |
| [mg/(g.min <sup>0.5</sup> )]   |        |        | [mg/(g.min <sup>0.5</sup> )] |       |        |
| 28.40                          | -41.69 | 0.9913 | 1.3805                       | 111.3 | 0.7082 |

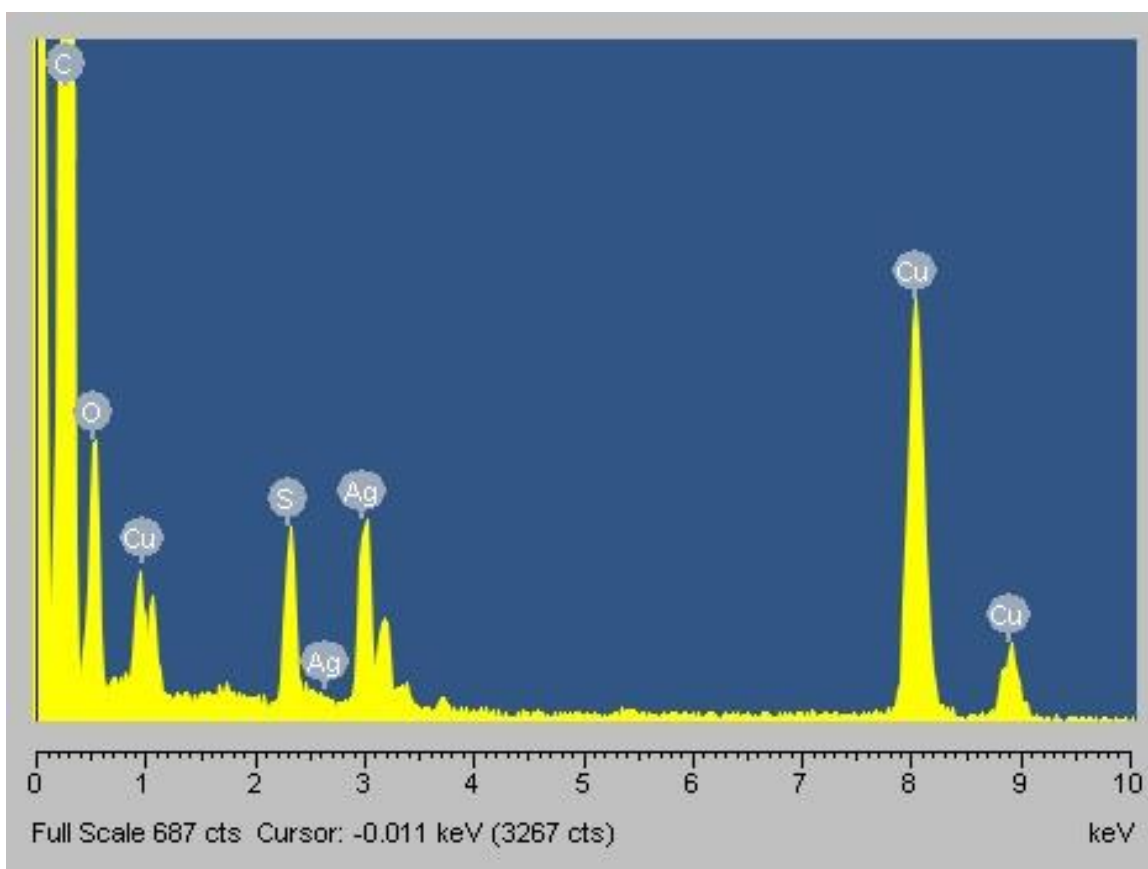

**Figure S1** EDS spectrum of CNTs–Ag<sub>2</sub>S.

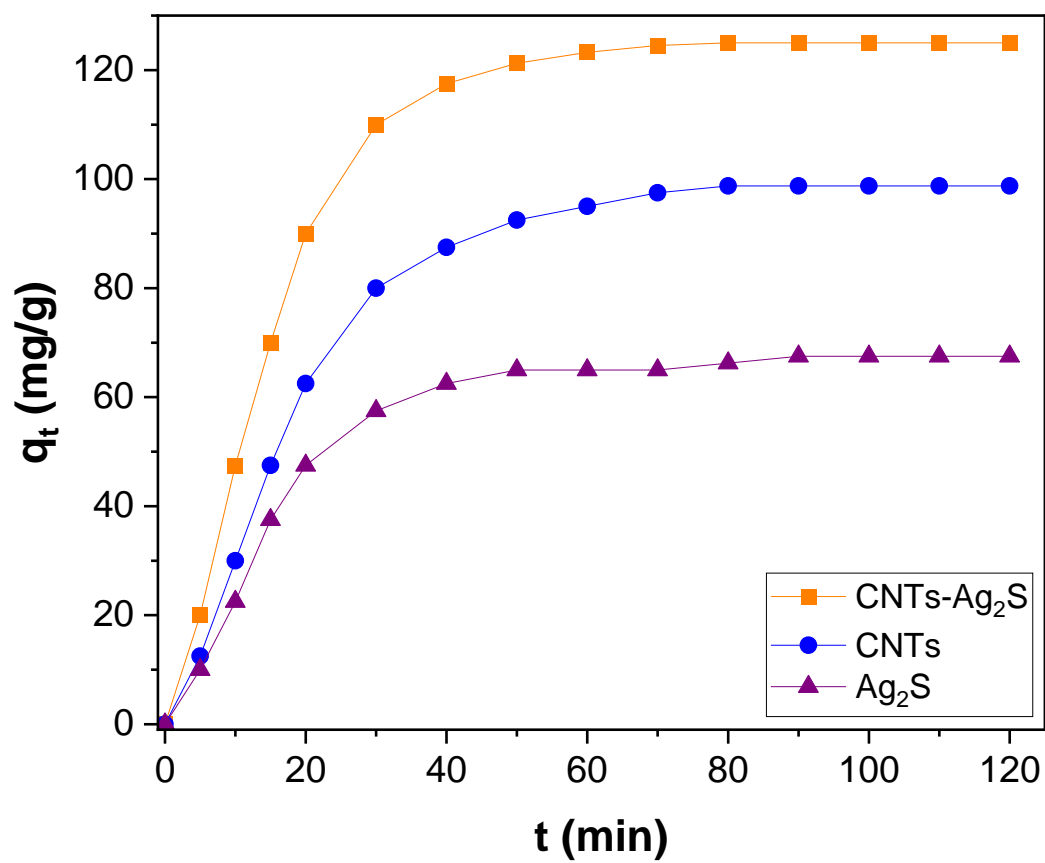

**Figure S2** Plot perceived  $q_t$  as a function of time for adsorption of Cd(II) over CNTs–Ag<sub>2</sub>S.

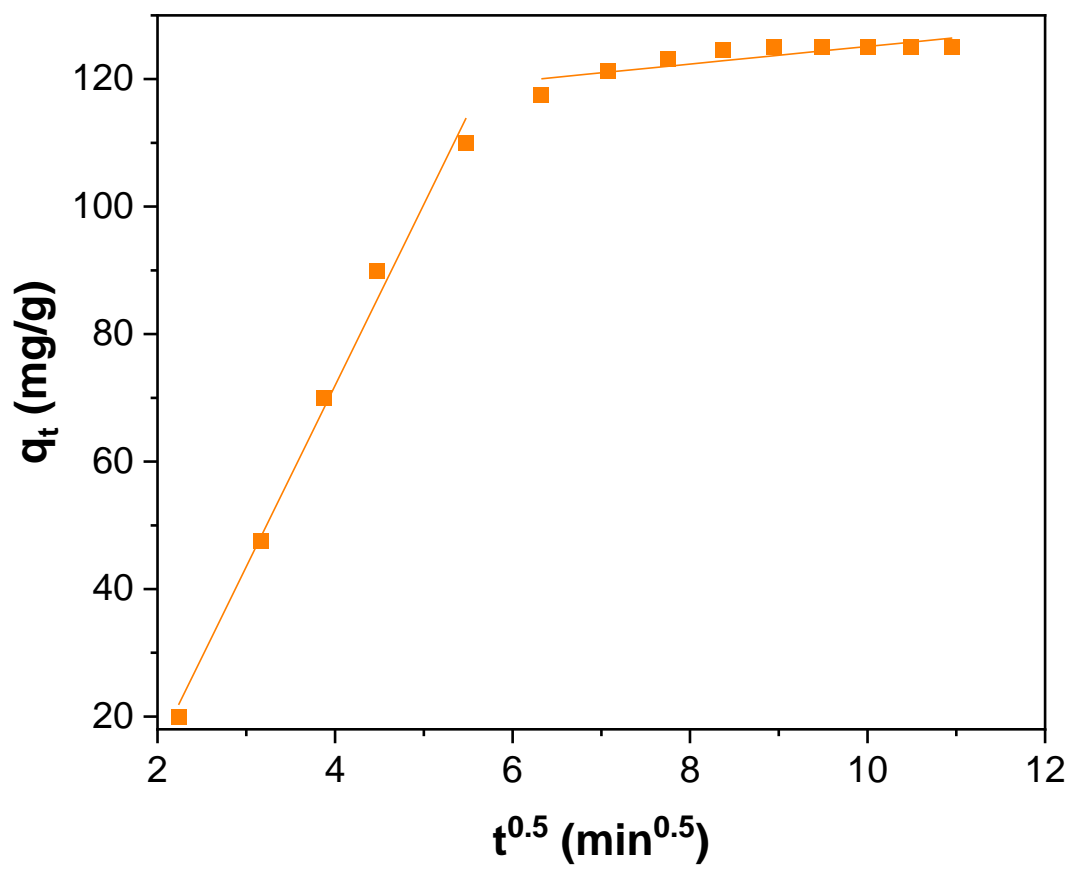

**Figure S3** Intraparticle diffusion model for adsorption of Cd(II) over CNTs–Ag<sub>2</sub>S.

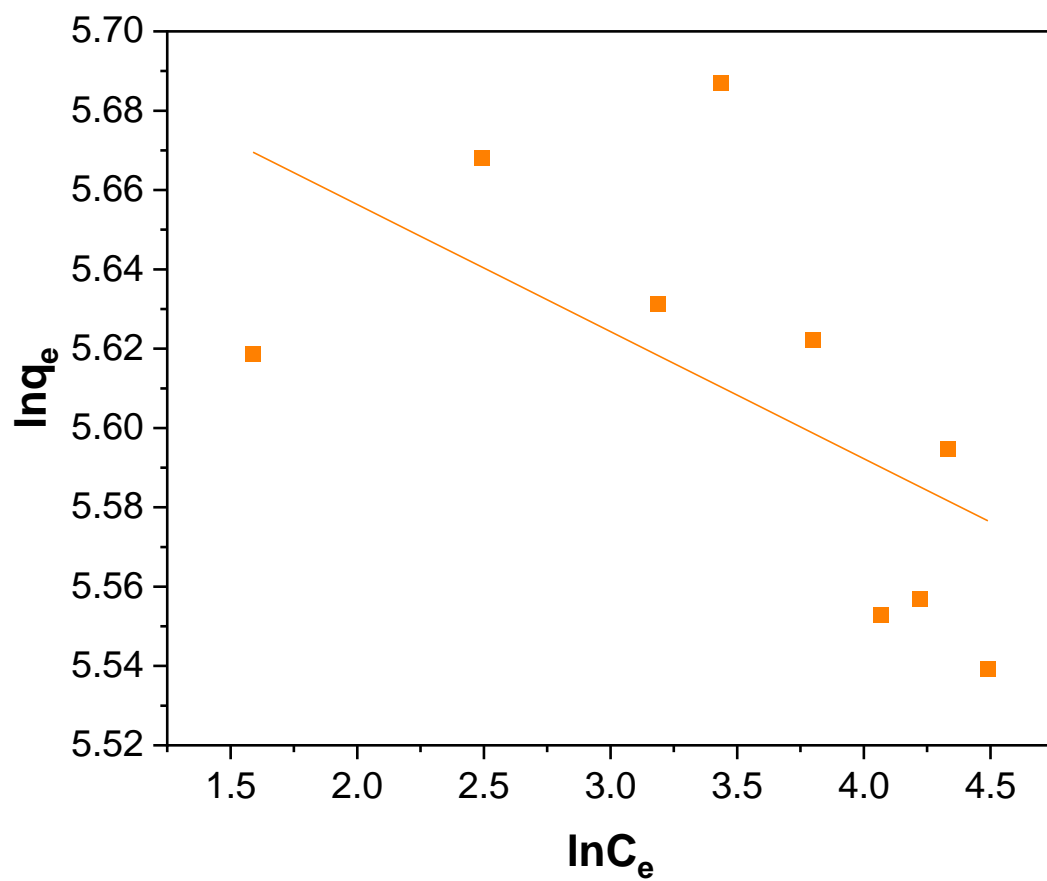

**Figure S4** Freundlich isotherm plot for adsorption of Cd(II) over CNTs–Ag<sub>2</sub>S.

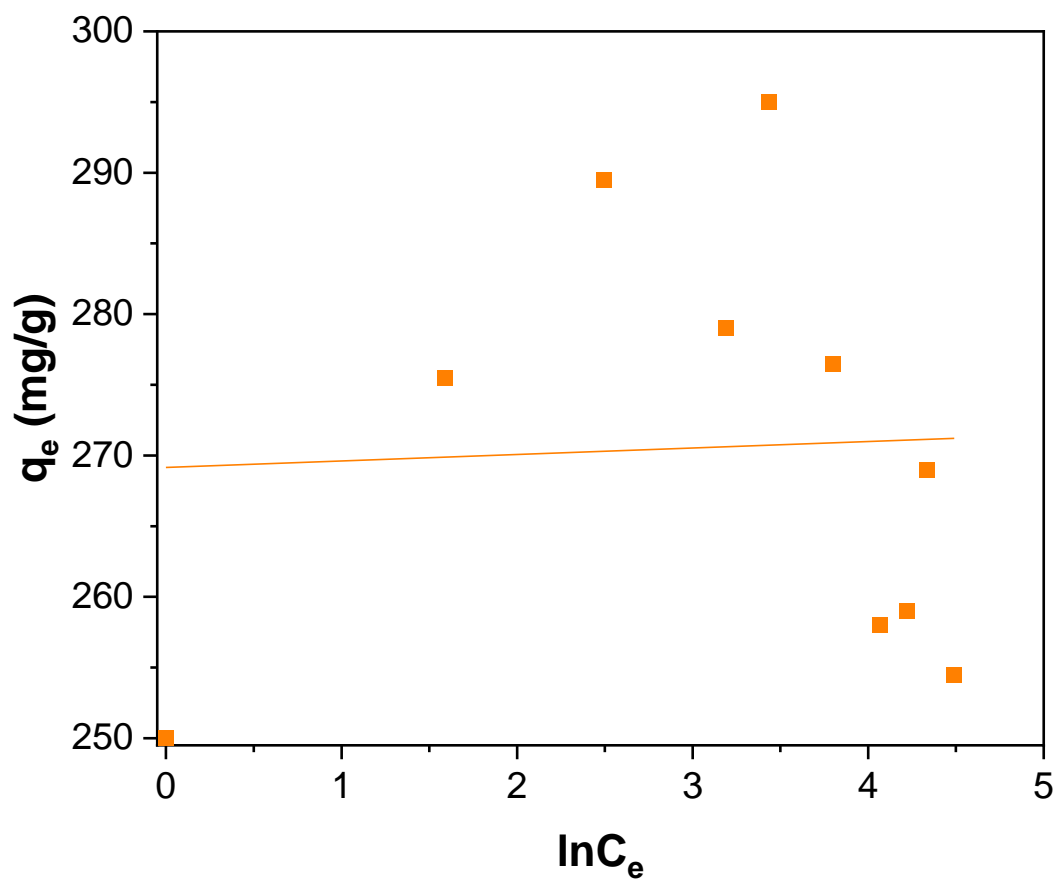

**Figure S5** Temkin isotherm plot for adsorption of Cd(II) over CNTs–Ag<sub>2</sub>S.

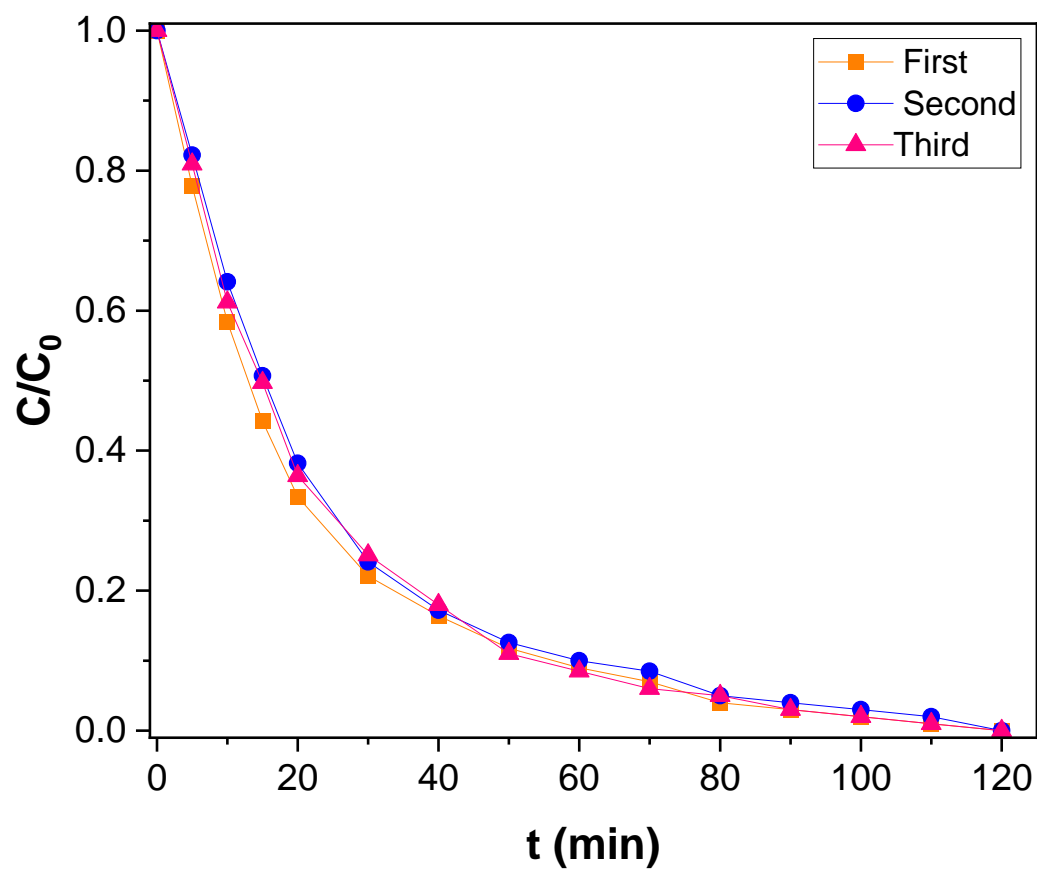

**Figure S6** Degradation of alizarin yellow R in presence of CNTs–Ag<sub>2</sub>S for successive three cycles under illumination to sunlight.

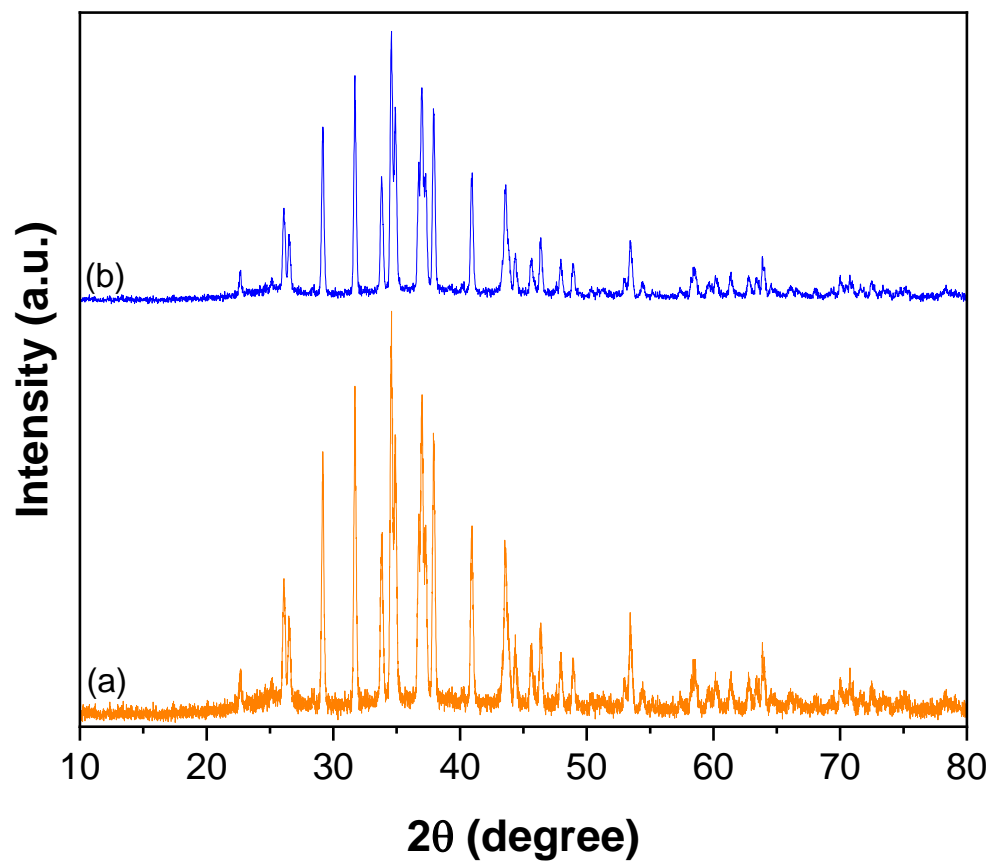

**Figure S7** XRD of CNTs-Ag<sub>2</sub>S (a) before and (b) after using in successive three cycles of photodegradation of alizarin yellow R under illumination to sunlight.
